# Supplementary material for: Bioactive Diterpenoids from Clerodendrum kiangsiense
Source: PubMed Central journal article supplement (PMC6273191; doi:10.3390/molecules21010086), 2016-01-15
Supplement: molecules-21-00086-s001.pdf [file molecules-21-00086-s001.pdf]

# Supplementary Materials: Bioactive Diterpenoids from *Clerodendrum kiangsiense*

Mingfeng Xu, Shengjia Wang, Ouya Jia, Qin Zhu and Lu'e Shi

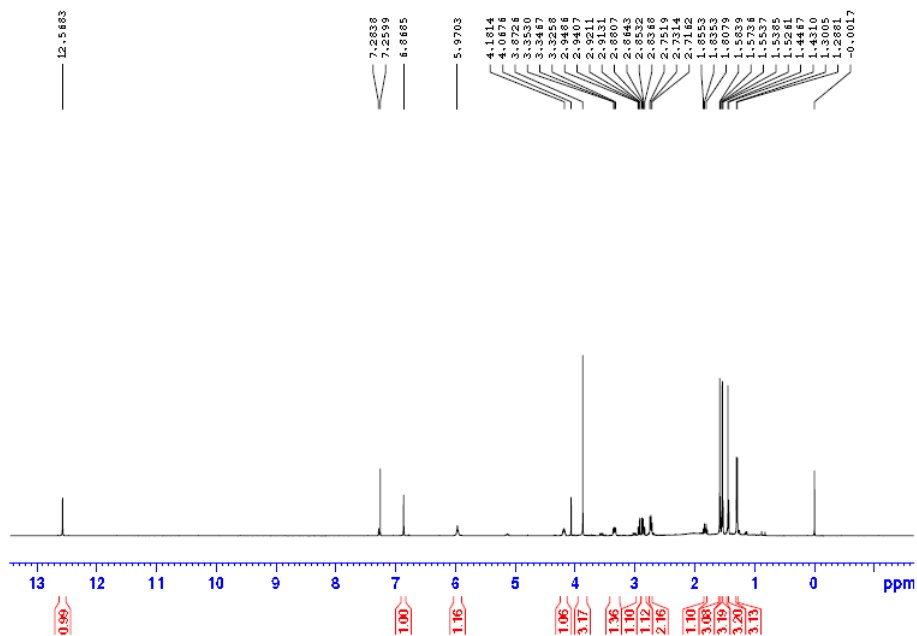

Figure S1.  $^1\text{H-NMR}$  of Compound 8.

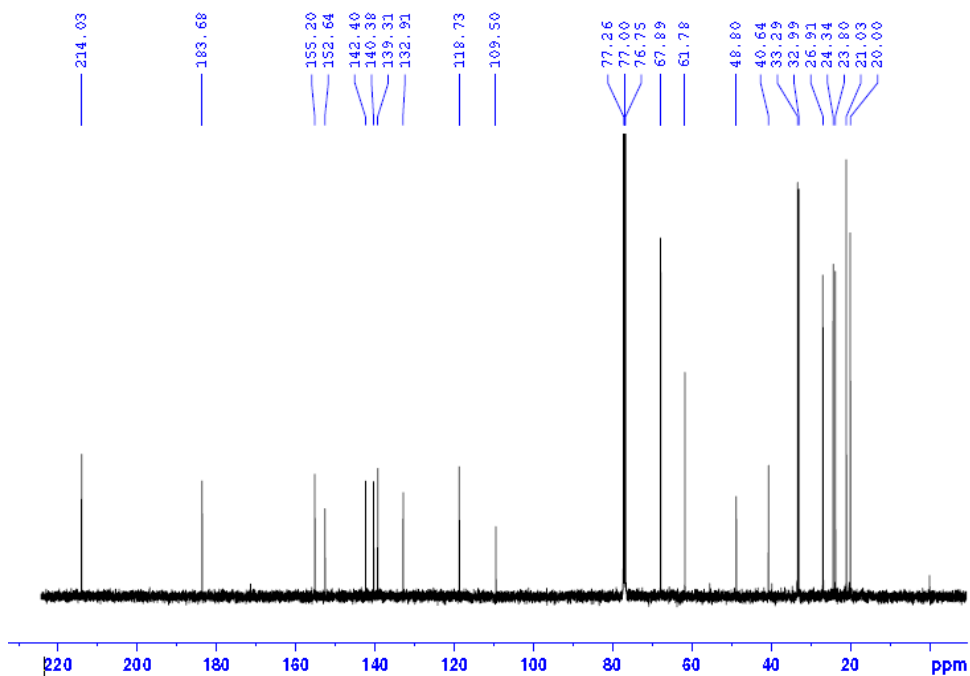

Figure S2.  $^{13}\text{C-NMR}$  of Compound 8.

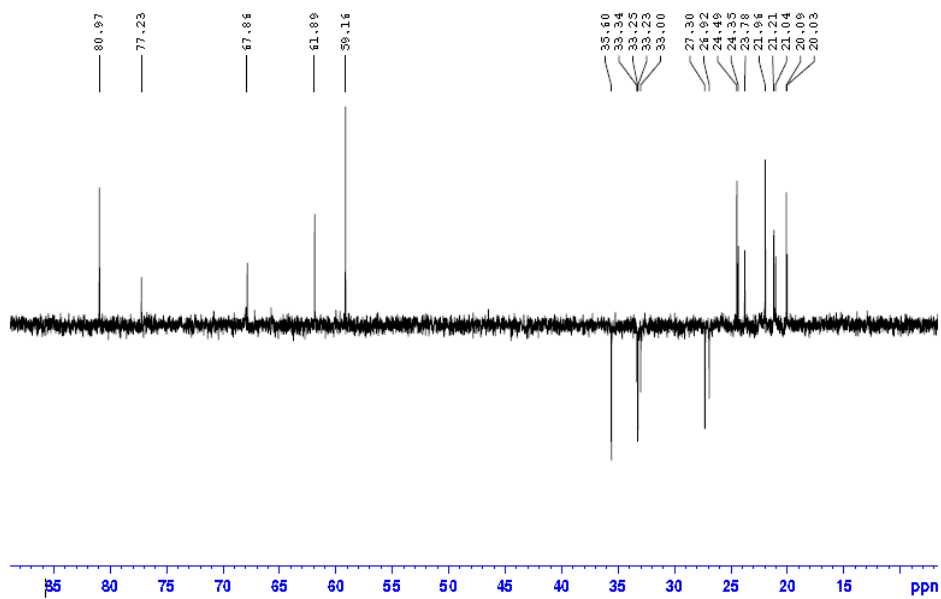

Figure S3. DEPT 135 of Compound 8.

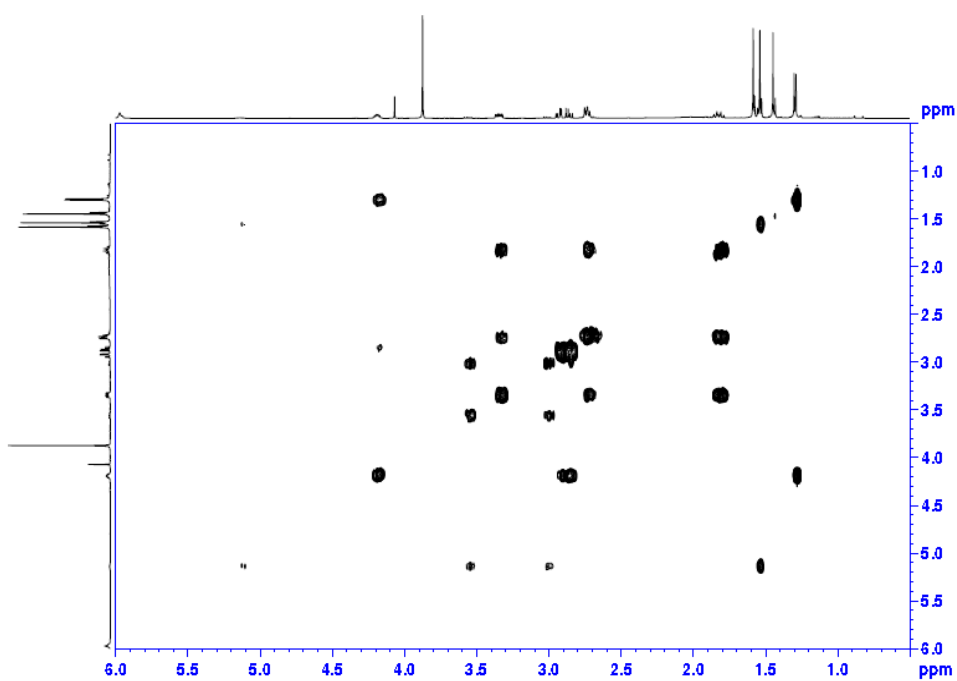Figure S4.  $^1\text{H}$ - $^1\text{H}$  COSY of Compound 8.

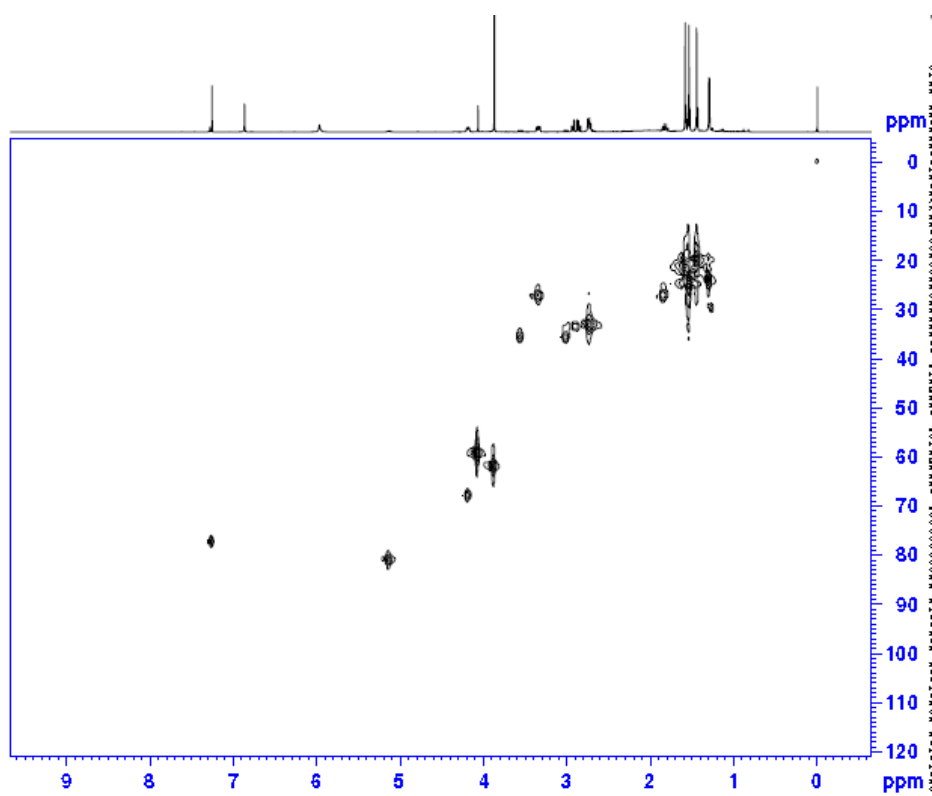

Figure S5. HSQC of Compound 8.

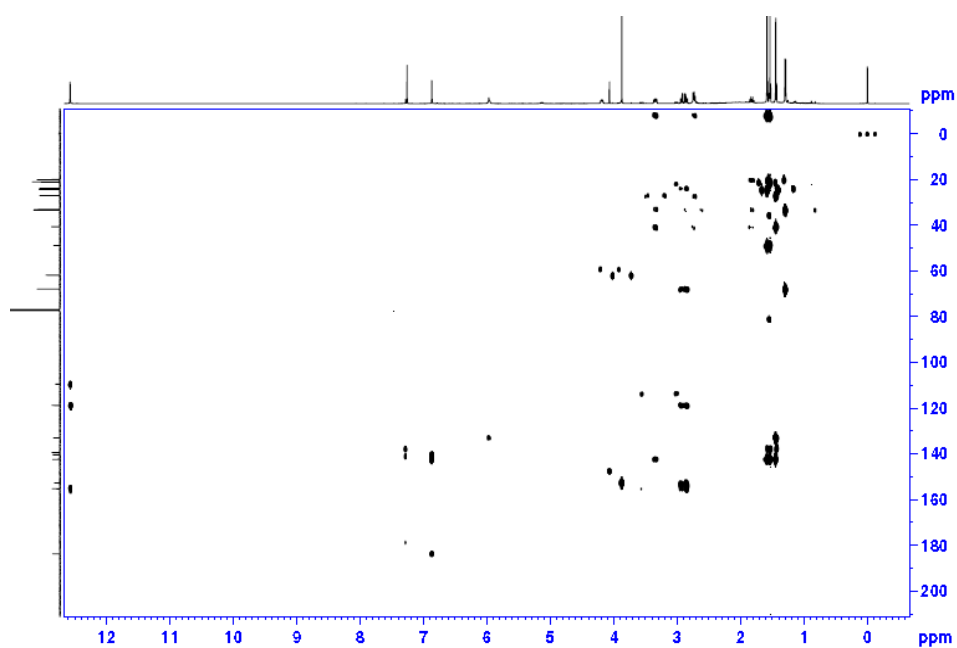

Figure S6. HMBC of Compound 8.
